# Supplementary material
Source: MDPI journal article supplement (https://www.mdpi.com/2227-7102/12/11/821)

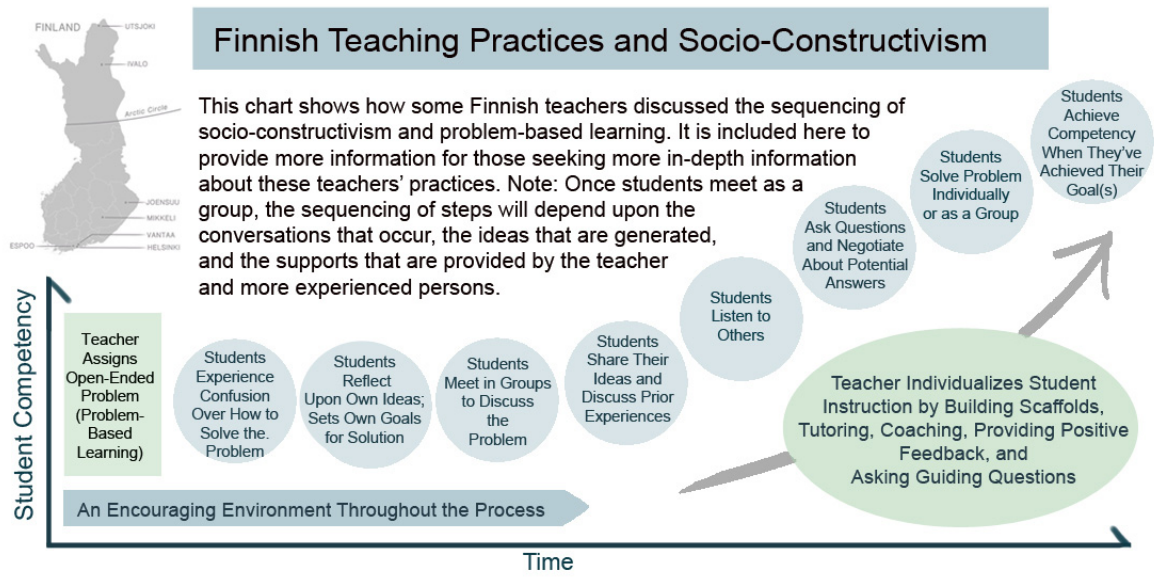

**Figure S1:** Finnish Teaching Practices and Socio-Constructivism.

Supplement: s1 [file s1 › education-2025368-supplementary.pdf]
